# Supplementary material for: Capture and culturing of single microalgae cells, and retrieval of colonies using a perforated hemispherical microwell structure
Source: Royal Society of Chemistry journal article supplement (doi:10.1039/c4ra09730k), 2014-01-01
Supplement: c4ra09730k1.pdf [file c4ra09730k1.pdf]

### Electronic Supplementary Information

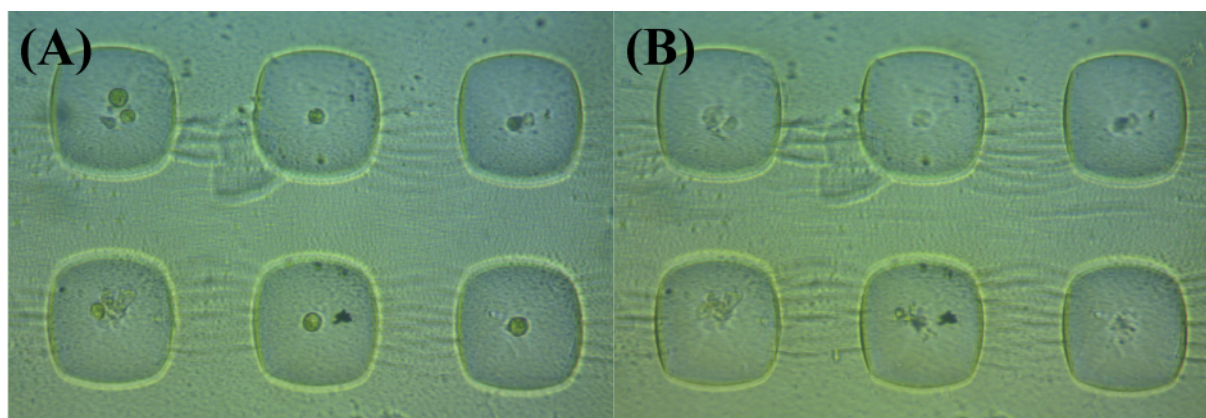

Fig. S1. Wild type *C. reinhardtii* cells in hygromycin B after (A) 3 h and (B) 12 h. All green pigmentation of the single cell disappeared after 12 h.
